# Supplementary material
Source: PubMed Central journal article supplement (PMC4622377)
Supplement: DS_10.1177_1941738115600143.pdf [file DS_10.1177_1941738115600143.pdf]

**Table 1. Characteristics of Volleyball-Related Injuries, HS RIO (High School) vs NCAA ISS (College) 2005-06 – 2008-09**

A.

| Exposure    | High School    |                 |                | College        |                 |                | Rate Ratio* | Lower Limit | Upper Limit |
|-------------|----------------|-----------------|----------------|----------------|-----------------|----------------|-------------|-------------|-------------|
|             | Total Injuries | Total Exposures | Rate (x10,000) | Total Injuries | Total Exposures | Rate (x10,000) |             |             |             |
| Practice    | 497            | 420,925         | 11.8           | 992            | 241,059         | 41.2           | 3.5         | 3.1         | 3.9         |
| Competition | 295            | 216,861         | 13.6           | 388            | 98,694          | 39.3           | 2.9         | 2.5         | 3.4         |
| Overall     | 792            | 637,786         | 12.4           | 1380           | 339,753         | 40.6           | 3.3         | 3.0         | 3.6         |

\*College/high school.

B.

| Skill leading to injury most often | Practice    |      |         |      | Competition |      |         |      | Overall     |      |         |      |
|------------------------------------|-------------|------|---------|------|-------------|------|---------|------|-------------|------|---------|------|
|                                    | High School |      | College |      | High School |      | College |      | High School |      | College |      |
|                                    | N           | %    | N       | %    | N           | %    | N       | %    | N           | %    | N       | %    |
| Blocking                           | 123         | 25.4 | 144     | 14.5 | 73          | 25.5 | 81      | 20.9 | 196         | 25.5 | 225     | 16.3 |
| Digging                            | 53          | 11.0 | 146     | 14.7 | 68          | 23.8 | 73      | 18.8 | 121         | 15.7 | 219     | 15.9 |
| Spiking                            | 62          | 12.8 | 153     | 15.4 | 38          | 13.3 | 69      | 17.8 | 100         | 13.0 | 222     | 16.1 |

C.

| Time Lost | Practice    |      |         |      | Competition |      |         |      | Overall     |      |         |      |
|-----------|-------------|------|---------|------|-------------|------|---------|------|-------------|------|---------|------|
|           | High School |      | College |      | High School |      | College |      | High School |      | College |      |
|           | N           | %    | N       | %    | N           | %    | N       | %    | N           | %    | N       | %    |
| 1-2 days  | 117         | 24.8 | 264     | 28.0 | 66          | 23.5 | 64      | 17.8 | 183         | 24.3 | 328     | 25.2 |
| 3-9 days  | 225         | 47.8 | 425     | 45.1 | 141         | 50.2 | 195     | 54.2 | 366         | 48.7 | 620     | 47.6 |
| 10+ days  | 129         | 27.4 | 253     | 26.9 | 74          | 26.3 | 101     | 28.1 | 203         | 27.0 | 354     | 27.2 |

D.

|                             | Competition |      |         |      |
|-----------------------------|-------------|------|---------|------|
|                             | High School |      | College |      |
| Position at time of injury* | N           | %    | N       | %    |
| Outside hitter              | 102         | 36.4 | 128     | 36.9 |
| Middle blocker              | 73          | 26.1 | 98      | 28.2 |
| Setter                      | 55          | 19.6 | 42      | 12.1 |
| Opposite player             | 25          | 8.9  | 26      | 7.5  |
| Libero                      | 20          | 7.1  | 42      | 12.1 |
| All other                   | 5           | 1.8  | 11      | 3.2  |

\*Position relevant to competition only.

**Table 2. Characteristics of Ankle Sprain Injuries, HS RIO (High School) vs NCAA ISS (College) 2005-06 – 2008-09**

A.

| Exposure    | High School    |                 |                | College        |                 |                | Rate Ratio* | Lower Limit | Upper Limit |
|-------------|----------------|-----------------|----------------|----------------|-----------------|----------------|-------------|-------------|-------------|
|             | Total Injuries | Total Exposures | Rate (x10,000) | Total Injuries | Total Exposures | Rate (x10,000) |             |             |             |
| Practice    | 179            | 420,925         | 4.3            | 160            | 241,051         | 6.6            | 1.6         | 1.3         | 1.9         |
| Competition | 94             | 216,861         | 4.3            | 103            | 98,702          | 10.4           | 2.4         | 1.8         | 3.2         |
| Overall     | 273            | 637,786         | 4.3            | 263            | 339,753         | 7.7            | 1.8         | 1.5         | 2.1         |

\*College/high school.

B.

| Most Common Ankle Sprain Diagnoses | High School | College |
|------------------------------------|-------------|---------|
| Lateral ligament sprain            | 76%         | 85%     |
| Ankle sprain, NOS                  | 22%         | 11%     |
| High ankle sprain                  | 1%          | 4%      |

C.

| Skill leading to injury most often | Practice    |      |         |      | Competition |      |         |      | Overall     |      |         |      |
|------------------------------------|-------------|------|---------|------|-------------|------|---------|------|-------------|------|---------|------|
|                                    | High School |      | College |      | High School |      | College |      | High School |      | College |      |
|                                    | N           | %    | N       | %    | N           | %    | N       | %    | N           | %    | N       | %    |
| Blocking                           | 87          | 49.4 | 63      | 39.4 | 43          | 47.8 | 41      | 39.8 | 130         | 48.9 | 104     | 39.5 |
| All other                          | 56          | 31.8 | 52      | 32.5 | 29          | 32.2 | 32      | 31.1 | 85          | 32.0 | 84      | 31.9 |
| Spiking                            | 27          | 15.3 | 35      | 21.9 | 13          | 14.4 | 26      | 25.2 | 40          | 15.0 | 61      | 23.2 |

D.

| Time Lost | Practice    |      |         |      | Competition |      |         |      | Overall     |      |         |      |
|-----------|-------------|------|---------|------|-------------|------|---------|------|-------------|------|---------|------|
|           | High School |      | College |      | High School |      | College |      | High School |      | College |      |
|           | N           | %    | N       | %    | N           | %    | N       | %    | N           | %    | N       | %    |
| 1-2 days  | 31          | 17.9 | 31      | 19.5 | 14          | 15.9 | 11      | 10.9 | 45          | 17.2 | 42      | 16.2 |
| 3-9 days  | 89          | 51.4 | 84      | 52.8 | 52          | 59.1 | 54      | 53.5 | 141         | 54.0 | 138     | 53.1 |
| 10+ days  | 53          | 30.6 | 44      | 27.7 | 22          | 25.0 | 36      | 35.6 | 75          | 28.7 | 80      | 30.8 |

**Table 3. Characteristics of Knee Injuries, HS RIO (High School) vs NCAA ISS (College) 2005-06 – 2008-09**

A.

| Exposure    | High School    |                 |                | College        |                 |                | Rate Ratio* | Lower Limit | Upper Limit |
|-------------|----------------|-----------------|----------------|----------------|-----------------|----------------|-------------|-------------|-------------|
|             | Total Injuries | Total Exposures | Rate (x10,000) | Total Injuries | Total Exposures | Rate (x10,000) |             |             |             |
| Practice    | 45             | 420,925         | 1.1            | 137            | 241,051         | 5.7            | 5.3         | 3.8         | 7.4         |
| Competition | 41             | 216,861         | 1.9            | 44             | 98,702          | 4.5            | 2.4         | 1.5         | 3.6         |
| Overall     | 86             | 637,786         | 1.3            | 181            | 339,753         | 5.3            | 4.0         | 3.1         | 5.1         |

\*College/high school.

B.

|                               |     |
|-------------------------------|-----|
| Most common knee diagnoses    |     |
| <b>High school</b>            |     |
| Ligament sprain - unspecified | 23% |
| Bursitis                      | 6%  |
| Contusion                     | 6%  |
| LCL sprain                    | 6%  |
| Tendon strain- unspecified    | 6%  |
| Patellar tendinopathy         | 6%  |
| Other                         | 47% |
| <b>College</b>                |     |
| Patellar tendinopathy         | 19% |
| Inflammation- unspecified     | 11% |
| MCL sprain                    | 8%  |
| Contusion                     | 8%  |
| Effusion                      | 7%  |
| Patellar subluxation          | 6%  |
| Other                         | 31% |

C.

|                                    | Practice    |      |         |      | Competition |      |         |      | Overall     |      |         |      |
|------------------------------------|-------------|------|---------|------|-------------|------|---------|------|-------------|------|---------|------|
|                                    | High School |      | College |      | High School |      | College |      | High School |      | College |      |
| Skill leading to injury most often | N           | %    | N       | %    | N           | %    | N       | %    | N           | %    | N       | %    |
| Digging                            | 11          | 24.4 | 23      | 16.8 | 15          | 37.5 | 9       | 20.5 | 26          | 30.6 | 32      | 17.7 |
| Blocking                           | 9           | 20.0 | 14      | 10.2 | 4           | 10.0 | 4       | 9.1  | 13          | 15.3 | 18      | 9.9  |
| Spiking                            | 1           | 2.2  | 10      | 7.3  | 10          | 25.0 | 9       | 20.5 | 11          | 12.9 | 19      | 10.5 |

D.

|           | Practice    |      |         |      | Competition |      |         |      | Overall     |      |         |      |
|-----------|-------------|------|---------|------|-------------|------|---------|------|-------------|------|---------|------|
|           | High School |      | College |      | High School |      | College |      | High School |      | College |      |
| Time lost | N           | %    | N       | %    | N           | %    | N       | %    | N           | %    | N       | %    |
| 1-2 days  | 12          | 29.3 | 30      | 23.6 | 3           | 7.7  | 10      | 25.6 | 15          | 18.8 | 40      | 24.1 |
| 3-9 days  | 16          | 39.0 | 45      | 35.4 | 15          | 38.5 | 17      | 43.6 | 31          | 38.8 | 62      | 37.3 |
| 10+ days  | 13          | 31.7 | 52      | 40.9 | 21          | 53.8 | 12      | 30.8 | 34          | 42.5 | 64      | 38.6 |

**Table 4. Characteristics of Shoulder Injuries, HS RIO (High School) vs NCAA ISS (College) 2005-06 – 2008-09**

A.

| Exposure    | High School    |                 |                | College        |                 |                | Rate Ratio* | Lower Limit | Upper Limit |
|-------------|----------------|-----------------|----------------|----------------|-----------------|----------------|-------------|-------------|-------------|
|             | Total Injuries | Total Exposures | Rate (x10,000) | Total Injuries | Total Exposures | Rate (x10,000) |             |             |             |
| Practice    | 50             | 420,925         | 1.2            | 106            | 241,051         | 4.4            | 3.7         | 2.6         | 5.2         |
| Competition | 16             | 216,861         | 0.7            | 29             | 98,702          | 2.9            | 4.0         | 2.2         | 7.3         |
| Overall     | 66             | 637,786         | 1.0            | 135            | 339,753         | 4.0            | 3.8         | 2.9         | 5.2         |

\*College/high school.

B.

|                                |     |
|--------------------------------|-----|
| Most common shoulder diagnoses |     |
| <b>High school</b>             |     |
| Musculotendinous strain        | 53% |
| Tendinosis                     | 21% |
| Dislocation                    | 5%  |
| Ligament sprain                | 5%  |
| Other                          | 16% |
| <b>College</b>                 |     |
| Tendinosis                     | 29% |
| Impingement                    | 14% |
| Subluxation                    | 14% |
| Musculotendinous strain        | 12% |
| Other                          | 31% |

C.

| Skill leading to injury most often | Practice    |      |         |      | Competition |      |         |      | Overall     |      |         |      |
|------------------------------------|-------------|------|---------|------|-------------|------|---------|------|-------------|------|---------|------|
|                                    | High School |      | College |      | High School |      | College |      | High School |      | College |      |
|                                    | N           | %    | N       | %    | N           | %    | N       | %    | N           | %    | N       | %    |
| Spiking                            | 19          | 38.8 | 42      | 39.6 | 6           | 40.0 | 9       | 31.0 | 25          | 39.1 | 51      | 37.8 |
| Digging                            | 2           | 4.1  | 12      | 11.3 | 3           | 20.0 | 7       | 24.1 | 5           | 7.8  | 19      | 14.1 |
| Blocking                           | 1           | 2.0  | 3       | 2.8  | 0           | 0.0  | 1       | 3.4  | 1           | 1.6  | 4       | 3.0  |

D.

|           | Practice    |      |         |      | Competition |      |         |      | Overall     |      |         |      |
|-----------|-------------|------|---------|------|-------------|------|---------|------|-------------|------|---------|------|
|           | High School |      | College |      | High School |      | College |      | High School |      | College |      |
| Time lost | N           | %    | N       | %    | N           | %    | N       | %    | N           | %    | N       | %    |
| 1-2 days  | 10          | 22.2 | 22      | 21.8 | 3           | 21.4 | 5       | 25.0 | 13          | 22.0 | 27      | 22.3 |
| 3-9 days  | 29          | 64.4 | 47      | 46.5 | 8           | 57.1 | 12      | 60.0 | 37          | 62.7 | 59      | 48.8 |
| 10+ days  | 6           | 13.3 | 32      | 31.7 | 3           | 21.4 | 3       | 15.0 | 9           | 15.3 | 35      | 28.9 |

**Table 5. Characteristics of Concussions, HS RIO (High School) vs NCAA ISS (College) 2005-06 – 2008-09**

A.

| Exposure    | High School    |                 |                | College        |                 |                | Rate Ratio* | Lower Limit | Upper Limit |
|-------------|----------------|-----------------|----------------|----------------|-----------------|----------------|-------------|-------------|-------------|
|             | Total Injuries | Total Exposures | Rate (x10,000) | Total Injuries | Total Exposures | Rate (x10,000) |             |             |             |
| Practice    | 15             | 420,925         | 0.4            | 44             | 241,051         | 1.8            | 5.1         | 2.9         | 9.2         |
| Competition | 23             | 216,861         | 1.1            | 25             | 98,702          | 2.5            | 2.4         | 1.4         | 4.2         |
| Overall     | 38             | 637,786         | 0.6            | 69             | 339,753         | 2.0            | 3.4         | 2.3         | 5.1         |

\*College/high school.

B.

| Skill leading to injury most often | Practice    |      |         |      | Competition |      |         |      | Overall     |      |         |      |
|------------------------------------|-------------|------|---------|------|-------------|------|---------|------|-------------|------|---------|------|
|                                    | High School |      | College |      | High School |      | College |      | High School |      | College |      |
|                                    | N           | %    | N       | %    | N           | %    | N       | %    | N           | %    | N       | %    |
| Digging                            | 8           | 53.3 | 21      | 47.7 | 14          | 60.9 | 14      | 56.0 | 22          | 57.9 | 35      | 50.7 |
| All others                         | 6           | 40.0 | 16      | 36.4 | 7           | 30.4 | 9       | 36.0 | 13          | 34.2 | 25      | 36.2 |
| Blocking                           | 1           | 6.7  | 4       | 9.2  | 2           | 8.7  | 1       | 4.0  | 3           | 7.9  | 5       | 7.2  |

C.

| Time lost | Practice    |      |         |      | Competition |      |         |      | Overall     |      |         |      |
|-----------|-------------|------|---------|------|-------------|------|---------|------|-------------|------|---------|------|
|           | High School |      | College |      | High School |      | College |      | High School |      | College |      |
|           | N           | %    | N       | %    | N           | %    | N       | %    | N           | %    | N       | %    |
| 1-2 days  | 3           | 21.4 | 6       | 13.6 | 3           | 13.6 | 2       | 8.7  | 6           | 16.7 | 8       | 11.9 |
| 3-9 days  | 7           | 50.0 | 31      | 70.5 | 11          | 50.0 | 12      | 52.2 | 18          | 50.0 | 43      | 64.2 |
| 10+ days  | 4           | 28.6 | 7       | 15.9 | 8           | 36.4 | 9       | 39.1 | 12          | 33.3 | 16      | 23.9 |
